# Supplementary material
Source: publisher site journal article supplement (https://www.dovepress.com/article/272078)
Supplement: Supplementary file 1 [file get_supplementary_file.php]

Supplementary materials

Supplement Table A. Goodness-of-fit chi-squared statistics compared to analyses of Akaike's Information Criterion (AIC), Bayesian Information Criterion (BIC), and AIC3

| Outcome | Trajectories | BIC | AIC | AIC3 |
| --- | --- | --- | --- | --- |
| WHOQOL overall | 1 | 2050,9379 | 2028,0269 | 2035,0269 |
| 2 | **1939,7864** | 1835,0504 | 1867,0504 |
| 3 | 1960,7783 | 1774,2173 | 1831,2173 |
| 4 | 2009,3766 | 1740,9906 | 1822,9906 |
| **5** | 2045,8327 | 1695,6217 | **1802,6217** |
| 6 | 2106,3225 | 1674,2865 | 1806,2865 |
| 7 | 2172,2746 | **1658,4137** | 1815,4137 |
| 8 | 2295,8922 | 1700,2063 | 1882,2063 |
| WHOQOL physical | 1 | 4226,8036 | 4203,8926 | 4210,8926 |
| 2 | **4196,9836** | 4092,2476 | 4124,2476 |
| 3 | 4215,3223 | 4028,7613 | 4085,7613 |
| 4 | 4260,188 | 3991,8021 | 4073,8021 |
| **5** | 4305,1406 | 3954,9296 | **4061,9296** |
| 6 | 4374,4037 | 3942,3678 | 4074,3678 |
| 7 | 4404,9565 | **3891,0956** | 4048,0956 |
| 8 | 4507,8661 | 3912,1802 | 4094,1802 |
| WHOQOL psychological | 1 | 3759,5738 | 3736,6628 | 3743,6628 |
| 2 | 3590,6399 | 3485,9039 | 3517,9039 |
| 3 | **3582,8551** | 3396,2942 | 3453,2942 |
| **4** | 3621,8361 | 3353,4501 | **3435,4501** |
| 5 | 3692,8281 | 3342,6171 | 3449,6171 |
| 6 | 3756,938 | 3324,9021 | 3456,9021 |
| 7 | 3792,8459 | **3278,985** | 3435,985 |
| 8 | 3904,2628 | 3308,5769 | 3490,5769 |
| SF-12 physical | 1 | 6242,8472 | 6219,9362 | 6226,9362 |
| 2 | **6069,4557** | 5964,7197 | 5996,7197 |
| 3 | 6106,424 | 5919,863 | 5976,863 |
| 4 | 6152,971 | 5884,5851 | 5966,5851 |
| **5** | 6181,6052 | 5831,3943 | **5938,3943** |
| 6 | 6248,8478 | 5816,8118 | 5948,8118 |
| 7 | 6288,1592 | **5774,2983** | 5931,2983 |
| 8 | 6381,8711 | 5786,1852 | 5968,1852 |
| SF-12 psychological | 1 | 6182,1475 | 6159,2365 | 6166,2365 |
| 2 | **6073,0493** | 5968,3133 | 6000,3133 |
| 3 | 6100,1297 | 5913,5687 | 5970,5687 |
| 4 | 6132,388 | 5864,002 | 5946,002 |
| **5** | 6166,7158 | 5816,5048 | **5923,5048** |
| 6 | 6233,1879 | 5801,152 | 5933,152 |
| 7 | 6239,8692 | **5726,0083** | 5883,0083 |
| 8 | 6359,1548 | 5763,4689 | 5945,4689 |

| Supplement Table B1. Characteristics for 5 classes on SF-12 physical health | | | | | | | | | |
| --- | --- | --- | --- | --- | --- | --- | --- | --- | --- |
|  | **Physical health** | | | | | | | | |
|  | Class 1 Good (n=48) | Class 2  Adequate(n=47) | Class 3 Excellent (n=38) | Class 4 Moderate (n=34) | Class 5 Poor (n=23) | | p value | | | |
| **Sociodemographic characteristics** |  |  |  |  |  | |  | | | |
| Age | **77.0** | **81.1** | **79.1** | **84.8** | | **78.1** | | | **<0.001** | |
| Sex |  |  |  |  | |  | | |  | |
| Male | **65.0** | **28.3** | **76.6** | **69.8** | | **42.7** | | | **<0.001** | |
| Female | **35.0** | **71.7** | **23.4** | **30.2** | | **57.3** | | |  | |
| Marital status |  |  |  |  | |  | | |  | |
| With partner | **77.0** | 20.4 | **41.0** | 49.6 | | **59.8** | | | **<0.001** | |
| No partner | **23.0** | 79.6 | **59.0** | 50.4 | | **40.2** | | |  | |
| Educational level |  |  |  |  | |  | | |  | |
| Low | 41.3 | 46.7 | 29.4 | 46.3 | | 31.6 | | | 0.0049 | |
| Intermediate | 55.5 | 36.8 | 43.7 | 33.9 | | 47.1 | | |  | |
| High | 2.3 | 12.4 | 26.9 | 18.2 | | 17.1 | | |  | |
| Level of independence |  |  |  |  | |  | | |  | |
| Independent | 62.7 | 30.7 | 79.3 | 55.0 | | 17.0 | | | 0.0044 | |
| Home Health Care | 23.0 | 59.3 | 13.9 | 27.2 | | 64.8 | | |  | |
| Nursing Facility | 4.3 | 6.0 | 6.6 | 14.7 | | 13.9 | | |  | |
| **Clinical characteristics** |  |  |  |  | |  | | |  | |
| Rutherford classification |  |  |  |  | |  | | |  | |
| 4 | 36.8 | **2.0** | **46.2** | **56.3** | | 30.5 | | | **0.0012** | |
| 5/6 | 63.2 | **98.0** | **53.8** | **43.7** | | 69.5 | | |  | |
| Smoking |  |  |  |  | |  | | |  | |
| Yes | **18.5** | **8.0** | **37.5** | 18.2 | | **47.3** | | | **0.0012** | |
| No | **79.4** | **92.0** | **58.5** | 81.2 | | **47.6** | | |  | |
| Comorbidities |  |  |  |  | |  | | |  | |
| Renal impairment |  |  |  |  | |  | | | 0.044 | |
| Yes | 40.2 | 69.1 | 38.4 | 64.4 | | 87.1 | | |  | |
| No | 59.8 | 30.9 | 61.6 | 35.6 | | 12.9 | | |  | |
| Diabetes mellitus |  |  |  |  | |  | | |  | |
| Yes | 57.1 | 50.3 | 30.4 | 38.5 | | 69.7 | | | 0.013 | |
| No | 42.9 | 49.7 | 69.6 | 61.5 | | 30.3 | | |  | |
| Cardiac disease |  |  |  |  | |  | | |  | |
| Yes | 61.6 | 79.5 | 46.9 | 73.3 | | 91.3 | | | 0.058 | |
| No | 38.4 | 20.5 | 53.1 | 26.7 | | 8.7 | | |  | |
| Treatment |  |  |  |  | |  | | |  | |
| Surgical | 55.4 | 22.6 | 46.0 | 19.6 | | 16.9 | | | 0.0066 | |
| Endovascular | 42.1 | 32.4 | 36.3 | 43.1 | | 70.2 | | |  | |
| Conservatively | 2.5 | 45.0 | 17.7 | 37.3 | | 12.9 | | |  | |
| Follow-up treatment |  |  |  |  | |  | | |  | |
| Surgical |  |  |  |  | |  | | |  | |
| Yes | 20.5 | **6.5** | 10.2 | 14.2 | | **29.3** | | | **<0.001** | |
| No | 79.5 | **93.5** | 89.8 | 85.8 | | **70.7** | | |  | |
| Endovascular |  |  |  |  | |  | | |  | |
| Yes | **8.1** | 28.7 | **15.5** | **20.1** | | 8.6 | | | **0.0019** | |
| No | **91.9** | 71.3 | **84.6** | **79.9** | | 91.4 | | |  | |
| Amputation |  |  |  |  | |  | | |  | |
| Yes | 29.9 | 36.5 | 2.8 | 21.5 | | 12.8 | | | 0.0053 | |
| No | 70.1 | 63.5 | 97.2 | 78.5 | | 87.2 | | |  | |
| Data are presented as %, except for age (mean estimate) A p value < 0.0035 was considered statistically significant | | | | |  | | |

| Supplement Table B1. Characteristics for 5 classes on SF-12 psychological health | | | | | | | | | |
| --- | --- | --- | --- | --- | --- | --- | --- | --- | --- |
|  | **Psychological health** | | | | | | | | |
|  | Class 1 Good (n=48) | Class 2 Excellent (n=46) | Class 3 Adequate (n=42) | Class 4 Moderate (n=32) | Class 5 Poor (n=22) | | p value | | | |
| **Sociodemographic characteristics** |  |  |  |  |  | |  | | | |
| Age | **76.6** | **79.5** | 82.0 | **84.1** | | **78.6** | | | **<0.001** | |
| Sex |  |  |  |  | |  | | |  | |
| Male | 59.8 | 69.0 | 56.8 | 40.8 | | 44.1 | | | 0.016 | |
| Female | 40.2 | 31.0 | 43.2 | 59.2 | | 55.9 | | |  | |
| Marital status |  |  |  |  | |  | | |  | |
| With partner | 67.1 | 39.1 | 44.2 | 37.7 | | 53.0 | | | 0.0068 | |
| No partner | 32.9 | 60.9 | 55.8 | 62.3 | | 47.0 | | |  | |
| Educational level |  |  |  |  | |  | | |  | |
| Low | 22.1 | 36.6 | 48.4 | 43.8 | | 64.8 | | | **0.0032** | |
| Intermediate | **69.3** | 46.8 | **21.6** | **47.0** | | **17.6** | | |  | |
| High | **8.6** | 16.6 | **25.4** | 6.2 | | **13.1** | | |  | |
| Level of independence |  |  |  |  | |  | | |  | |
| Independent | 85.7 | 70.3 | 30.3 | 13.0 | | 30.8 | | | 0.0039 | |
| Home Health Care | 6.0 | 21.9 | 62.8 | 46.3 | | 64.7 | | |  | |
| Nursing Facility | 6.3 | 7.9 | 0.0 | 28.3 | | 0.0 | | |  | |
| **Clinical characteristics** |  |  |  |  | |  | | |  | |
| Rutherford classification |  |  |  |  | |  | | |  | |
| 4 | 58.0 | 38.6 | 11.7 | 15.4 | | 30.8 | | | 0.073 | |
| 5/6 | 42.0 | 61.4 | 88.3 | 84.6 | | 69.2 | | |  | |
| Smoking |  |  |  |  | |  | | |  | |
| Yes | 23.8 | 19.4 | 30.4 | 6.2 | | 39.5 | | | 0.0095 | |
| No | 72.5 | 78.5 | 69.7 | 90.2 | | 60.5 | | |  | |
| Comorbidities |  |  |  |  | |  | | |  | |
| Renal impairment |  |  |  |  | |  | | |  | |
| Yes | **43.7** | 53.8 | **71.9** | **43.8** | | **82.5** | | | **<0.001** | |
| No | **56.3** | 46.2 | **28.1** | **56.2** | | **17.5** | | |  | |
| Diabetes mellitus |  |  |  |  | |  | | |  | |
| Yes | **37.3** | **37.7** | 61.6 | **80.9** | | **22.1** | | | **<0.001** | |
| No | **62.7** | **62.3** | 38.4 | **19.1** | | **77.9** | | |  | |
| Cardiac disease |  |  |  |  | |  | | |  | |
| Yes | 58.8 | 65.1 | **74.2** | **90.7** | | **56.3** | | | **0.0033** | |
| No | 41.3 | 34.9 | **25.8** | **9.3** | | **43.7** | | |  | |
| Treatment |  |  |  |  | |  | | |  | |
| Surgical | 54.1 | 51.2 | **6.8** | **24.7** | | **22.0** | | | **0.0026** | |
| Endovascular | **41.6** | 30.4 | 48.4 | **44.5** | | **52.1** | | |  | |
| Conservatively | **4.3** | 18.4 | **44.9** | 30.8 | | **26.0** | | |  | |
| Follow-up treatment |  |  |  |  | |  | | |  | |
| Surgical |  |  |  |  | |  | | |  | |
| Yes | 22.4 | 0.0 | **25.4** | **3.1** | | **26.5** | | | **<0.001** | |
| No | 77.6 | 100.0 | **74.6** | **96.9** | | **73.5** | | |  | |
| Endovascular |  |  |  |  | |  | | |  | |
| Yes | 14.4 | 25.2 | 9.3 | 15.4 | | 21.7 | | | 0.004 | |
| No | 85.6 | 74.9 | 90.7 | 84.6 | | 78.3 | | |  | |
| Amputation |  |  |  |  | |  | | |  | |
| Yes | **9.1** | **17.5** | **42.2** | 24.7 | | **21.9** | | | **0.0014** | |
| No | **90.9** | **82.4** | **57.8** | 75.3 | | **78.1** | | |  | |
| Data are presented as %, except for age (mean estimate) A p value < 0.0035 was considered statistically significant | | | | |  | | |

| Supplement Table B2. Characteristics for 5 classes on WHOQOL | | | | | | | | | |
| --- | --- | --- | --- | --- | --- | --- | --- | --- | --- |
|  | **Overall health** | | | | | | | | |
|  | Class 1 Adequate (n=62) | Class 2 Good (n=46) | Class 3  Moderate & Improving  (n=38) | Class 4 Moderate  (n=33) | Class 5 Poor (n=14) | | p value | | | |
| **Sociodemographic characteristics** |  |  |  |  |  | |  | | | |
| Age | **83.8** | **79.9** | **77.2** | **77.2** | | 77.1 | | | **<0.001** | |
| Sex |  |  |  |  | |  | | |  | |
| Male | 57.7 | 71.9 | 43.1 | 44.5 | | 64.7 | | | 0.0073 | |
| Female | 42.3 | 28.1 | 56.9 | 55.5 | | 35.3 | | |  | |
| Marital status |  |  |  |  | |  | | |  | |
| With partner | 52.2 | 39.5 | 55.9 | 34.1 | | 78.7 | | | 0.0052 | |
| No partner | 47.8 | 60.5 | 44.1 | 65.9 | | 21.3 | | |  | |
| Educational level | 3 missing |  |  |  | |  | | |  | |
| Low | 53.8 | 33.4 | 35.3 | 33.2 | | 29.1 | | | 0.052 | |
| Intermediate | 30.5 | 47.3 | 49.3 | 57.0 | | 42.2 | | |  | |
| High | 13.0 | 19.3 | 15.4 | 5.9 | | 21.5 | | |  | |
| Level of independence | 3 missing |  |  |  | |  | | |  | |
| Independent | 31.8 | 67.5 | 71.4 | 45.9 | | 42.8 | | | **0.002** | |
| Home Health Care | **60.0** | 19.7 | **7.8** | 39.4 | | 50.0 | | |  | |
| Nursing Facility | **2.0** | 10.5 | **18.2** | 8.8 | | 0.0 | | |  | |
| **Clinical characteristics** |  |  |  |  | |  | | |  | |
| Rutherford classification |  |  |  |  | |  | | |  | |
| 4 | 27.7 | 36.8 | **66.5** | **3.1** | | 21.5 | | | **0.0029** | |
| 5/6 | 72.3 | 63.2 | **33.5** | **96.9** | | 78.5 | | |  | |
| Smoking |  |  |  |  | |  | | |  | |
| Yes | **88.5** | 73.6 | **46.5** | **91.2** | | 56.5 | | | **0.0018** | |
| No | **11.5** | 26.4 | **43.1** | **8.8** | | 43.5 | | |  | |
| Comorbidities |  |  |  |  | |  | | |  | |
| Renal impairment |  |  |  |  | |  | | |  | |
| Yes | **47.5** | **57.6** | **48.1** | 20.9 | | 14.5 | | | **<0.001** | |
| No | **52.5** | **42.4** | **51.9** | 79.1 | | 85.5 | | |  | |
| Diabetes mellitus |  |  |  |  | |  | | |  | |
| Yes | 51.7 | 50.9 | 71.4 | 28.3 | | 57.6 | | | 0.015 | |
| No | 48.3 | 49.1 | 28.6 | 71.7 | | 42.4 | | |  | |
| Cardiac disease |  |  |  |  | |  | | |  | |
| Yes | 18.5 | 40.0 | 53.3 | 21.9 | | 21.7 | | | 0.078 | |
| No | 81.5 | 60.0 | 46.7 | 78.1 | | 78.3 | | |  | |
| Treatment |  |  |  |  | |  | | |  | |
| Surgical | 20.6 | 44.3 | 69.0 | 15.2 | | 14.4 | | | 0.036 | |
| Endovascular | 51.0 | 36.2 | 23.5 | 39.6 | | 78.3 | | |  | |
| Conservatively | 28.4 | 19.5 | 7.5 | 45.3 | | 7.4 | | |  | |
| Follow-up treatment |  |  |  |  | |  | | |  | |
| Surgical |  |  |  |  | |  | | |  | |
| Yes | 11.6 | 12.9 | 18.0 | 8.8 | | 42.3 | | | 0.064 | |
| No | 88.4 | 87.1 | 82.0 | 91.2 | | 57.7 | | |  | |
| Endovascular |  |  |  |  | |  | | |  | |
| Yes | 12.7 | 17.2 | 2.6 | 41.9 | | 14.2 | | | 0.01 | |
| No | 87.3 | 82.8 | 97.4 | 58.1 | | 85.8 | | |  | |
| Amputation |  |  |  |  | |  | | |  | |
| Yes | 29.8 | 15.1 | 0.0 | 45.4 | | 21.7 | | | 0.0091 | |
| No | 70.2 | 84.9 | 100.0 | 54.6 | | 78.3 | | |  | |
| Data are presented as %, except for age (mean estimate) A p value < 0.0035 was considered statistically significant | | | | |  | | |

| Supplement B2. Characteristics for 5 classes on WHOQOL | | | | | | | | | | |
| --- | --- | --- | --- | --- | --- | --- | --- | --- | --- | --- |
|  | **Physical health** | | | | | | | | | |
|  | Class 1 Poor & Improving (n=65) | Class 2 Good (n=39) | Class 3 Excellent(n=37) | Class 4 Poor (n=26) | Class 5 Moderate (n=26) | | | p value | | | |
| **Sociodemographic characteristics** |  |  |  |  |  | | |  | | | |
| Age | 78.6 | **80.7** | **81.6** | **80.0** | | 80.0 | | | | **0.0014** | |
| Sex |  |  |  |  | |  | | | |  | |
| Male | **43.6** | **25.8** | **83.3** | **67.5** | | **84.6** | | | | **<0.001** | |
| Female | **56.4** | **74.2** | **16.7** | **32.5** | | **15.4** | | | |  | |
| Marital status |  |  |  |  | |  | | | |  | |
| With partner | 46.7 | 41.1 | **40.6** | 52.5 | | **73.0** | | | | **0.0021** | |
| No partner | 53.3 | 58.9 | **59.4** | 47.5 | | **27.0** | | | |  | |
| Educational level | 3 missing |  |  |  | |  | | | |  | |
| Low | 34.1 | 31.0 | 40.9 | 45.5 | | 61.5 | | | | 0.019 | |
| Intermediate | 44.3 | 58.5 | 45.5 | 37.4 | | 23.1 | | | |  | |
| High | 17.1 | 10.5 | 13.7 | 13.4 | | 15.4 | | | |  | |
| Level of independence | 3 missing |  |  |  | |  | | | |  | |
| Independent | 57.1 | 30.9 | 67.6 | 45.1 | | 50.1 | | | | 0.0089 | |
| Home Health Care | 38.3 | 41.5 | 13.3 | 47.3 | | 42.2 | | | |  | |
| Nursing Facility | 3.0 | 22.4 | 13.8 | 0.1 | | 0 | | | |  | |
| **Clinical characteristics** |  |  |  |  | |  | | | |  | |
| Rutherford classification |  |  |  |  | |  | | | |  | |
| 4 | **30.3** | **15.3** | 42.9 | 26.2 | | 57.7 | | | | **<0.001** | |
| 5/6 | **69.7** | **84.7** | 57.1 | 73.8 | | 42.3 | | | |  | |
| Smoking |  |  |  |  | |  | | | |  | |
| Yes | **67.2** | **98.8** | **53.4** | **68.7** | | 96.2 | | | | **<0.001** | |
| No | **29.8** | **0** | **42.9** | **31.3** | | 42.3 | | | |  | |
| Comorbidities |  |  |  |  | |  | | | |  | |
| Renal impairment |  |  |  |  | |  | | | |  | |
| Yes | **44.3** | **58.9** | 48.4 | **85.0** | | 69.4 | | | | **<0.001** | |
| No | **55.7** | **41.1** | 51.6 | **15.0** | | 30.6 | | | |  | |
| Diabetes mellitus |  |  |  |  | |  | | | |  | |
| Yes | 55.1 | 45.0 | 21.4 | 49.6 | | 73.0 | | | | 0.035 | |
| No | 44.9 | 55.0 | 78.6 | 50.4 | | 27.0 | | | |  | |
| Cardiac disease |  |  |  |  | |  | | | |  | |
| Yes | 61.2 | 87.4 | 57.0 | 72.1 | | 73.2 | | | | 0.021 | |
| No | 38.8 | 12.6 | 43.0 | 27.9 | | 26.8 | | | |  | |
| Treatment |  |  |  |  | |  | | | |  | |
| Surgical | 45.5 | 23.2 | 45.5 | 0.0 | | 42.3 | | | | 0.025 | |
| Endovascular | 43.2 | 42.2 | 27.8 | 55.2 | | 46.1 | | | |  | |
| Conservatively | 11.3 | 34.7 | 26.7 | 44.8 | | 11.6 | | | |  | |
| Follow-up treatment |  |  |  |  | |  | | | |  | |
| Surgical |  |  |  |  | |  | | | |  | |
| Yes | 25.9 | 5.1 | 0.0 | 26.3 | | 11.5 | | | | 0.005 | |
| No | 74.1 | 94.9 | 100.0 | 73.7 | | 88.5 | | | |  | |
| Endovascular |  |  |  |  | |  | | | |  | |
| Yes | **4.6** | **19.9** | **21.2** | **38.2** | | 15.4 | | | | **<0.001** | |
| No | **95.4** | **80.1** | **78.7** | **61.8** | | 84.6 | | | |  | |
| Amputation |  |  |  |  | |  | | | |  | |
| Yes | 23.7 | 17.4 | 29.8 | 39.0 | | 0.0 | | | | 0.099 | |
| No | 76.3 | 82.6 | 70.2 | 61.0 | | 100.0 | | | |  | |
| Data are presented as %, except for age (mean estimate) A p value < 0.0035 was considered statistically significant | | | | |  | | | |
| **Supplement B2. Characteristics for 4 classes on WHOQOL** | | | | | | |
|  | **Psychological Health** | | | | | |
|  | Class 1 Adequate(n=70) | Class 2  Moderate (n=56) | Class 3 Good (n=52) | Class 4 Poor (n=17) | p value | |
| **Sociodemographic characteristics** |  |  |  |  |  | |
| Age | **75.9** | **84.7** | **80.6** | **78.8** | **<0.001** | | | |
| Sex |  |  |  |  |  | | | |
| Male | 62.0 | 46.1 | 62.6 | 49.2 | 0.15 | | | |
| Female | 38.0 | 53.9 | 37.4 | 50.8 |  | | | |
| Marital status |  |  |  |  |  | | | |
| With partner | 63.6 | 35.7 | 38.7 | 62.0 | 0.041 | | | |
| No partner | 36.4 | 64.3 | 61.3 | 38.0 |  | | | |
| Educational level |  |  |  |  |  | | | |
| Low | 25.3 | 54.1 | 38.7 | 57.3 | 0.075 | | | |
| Intermediate | 59.5 | 35.1 | 38.0 | 23.8 |  | | | |
| High | 11.5 | 10.5 | 23.2 | 12.0 |  | | | |
| Level of independence |  |  |  |  |  | | | |
| Independent | 61.4 | 35.2 | 62.0 | 30.5 | 0.011 | | | |
| Home Health Care | 37.0 | 31.3 | 36.1 | 46.1 |  | | | |
| Nursing Facility | 0 | 24.9 | 1.9 | 5.9 |  | | | |
| **Clinical characteristics** |  |  |  |  |  | | | |
| Rutherford classification |  |  |  |  |  | | | |
| 4 | 34.8 | 28.4 | 37.0 | 26.2 | 0.035 | | | |
| 5/6 | 65.2 | 71.6 | 63.0 | 73.8 |  | | | |
| Smoking |  |  |  |  |  | | | |
| Yes | 29.6 | 23.0 | 10.9 | 34.2 | 0.020 | | | |
| No | 70.4 | 71.7 | 89.1 | 60.0 |  | | | |
| Comorbidities |  |  |  |  |  | | | |
| Renal impairment |  |  |  |  |  | | | |
| Yes | 45.2 | 66.5 | 56.5 | 74.5 | 0.054 | | | |
| No | 54.8 | 33.5 | 43.6 | 25.5 |  | | | |
| Diabetes mellitus |  |  |  |  |  | | | |
| Yes | 64.1 | 25.1 | 54.8 | 39.5 | 0.0094 | | | |
| No | 35.9 | 74.9 | 45.2 | 60.5 |  | | | |
| Cardiac disease |  |  |  |  |  | | | |
| Yes | 68.4 | 79.0 | 61.8 | 57.2 | 0.011 | | | |
| No | 31.6 | 21.0 | 38.2 | 42.8 |  | | | |
| Treatment |  |  |  |  |  | | | |
| Surgical | 45.5 | 17.8 | 38.2 | 32.1 | 0.11 | | | |
| Endovascular | 39.4 | 40.6 | 44.5 | 50.4 |  | | | |
| Conservatively | 15.1 | 41.6 | 17.3 | 17.5 |  | | | |
| Follow-up treatment |  |  |  |  |  | | | |
| Surgical |  |  |  |  |  | | | |
| Yes | 10.0 | 20.6 | 8.5 | 35.2 | 0.020 | | | |
| No | 90.0 | 79.4 | 91.5 | 64.8 |  | | | |
| Endovascular |  |  |  |  |  | | | |
| Yes | 11.2 | 31.8 | 10.1 | 11.7 | 0.0057 | | | |
| No | 88.8 | 68.2 | 89.9 | 88.3 |  | | | |
| Amputation |  |  |  |  |  | | | |
| Yes | 26.7 | 31.8 | 7.7 | 20.5 | 0.0068 | | | |
| No | 73.3 | 68.2 | 92.3 | 79.5 |  | | | |
| Data are presented as %, except for age (mean estimate) A p value < 0.0035 was considered statistically significant | | | | |  | | | |
